# Supplementary figures and images for: The Contribution of Hepatic Macrophage Heterogeneity during Liver Regeneration after Partial Hepatectomy in Mice
Source: Hindawi journal article supplement (doi:10.1155/2022/3353250), 2022-10-07

**A****BM**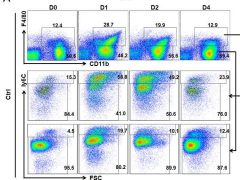**B****Blood**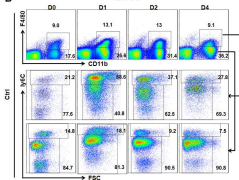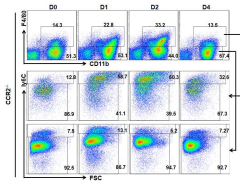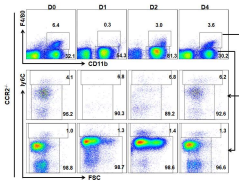

Supplement: f1 [file 3353250.f1.zip]

**A**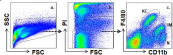**B**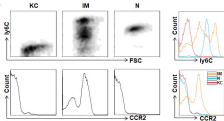

Supplement: f1 [file 3353250.f1.zip]
